# Supplementary material
Source: PubMed Central journal article supplement (PMC2230550)

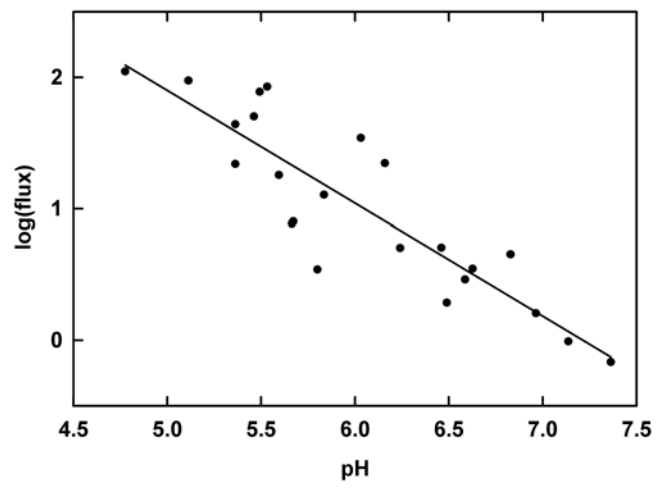

Supplement: plntphys_pp.107.110643_2.pdf [file plntphys_pp.107.110643_2.pdf]
